# Supplementary material
Source: PubMed Central journal article supplement (PMC4975922)

# Figure S1

## A

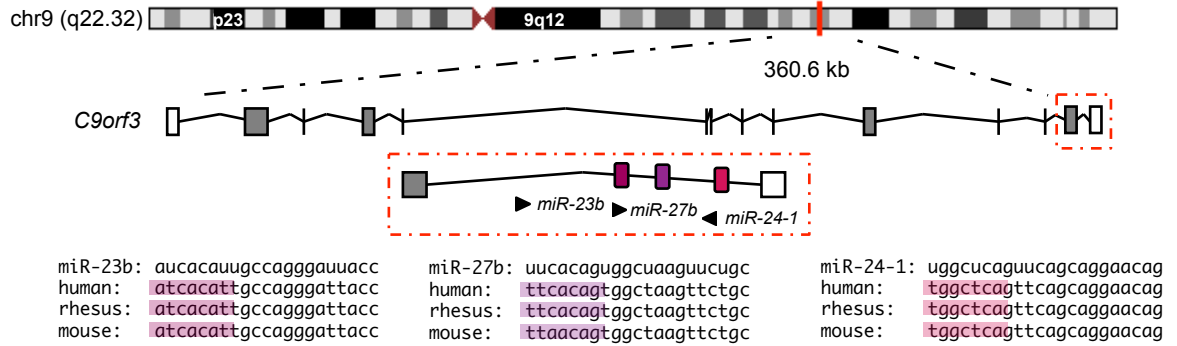

## B

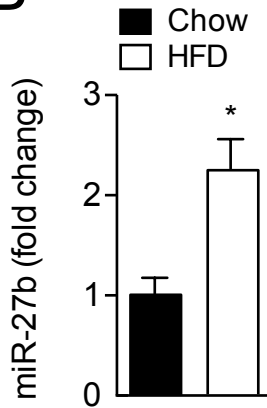

## C

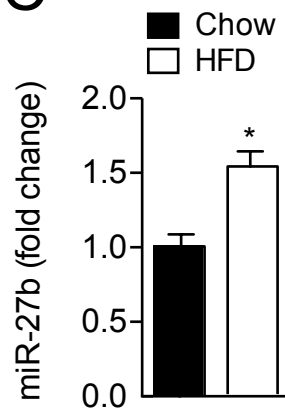

Supplement: NIHMS735530-supplement-1.pdf [file NIHMS735530-supplement-1.pdf]

Figure S2

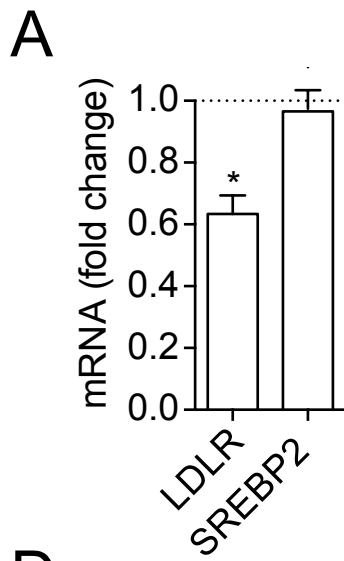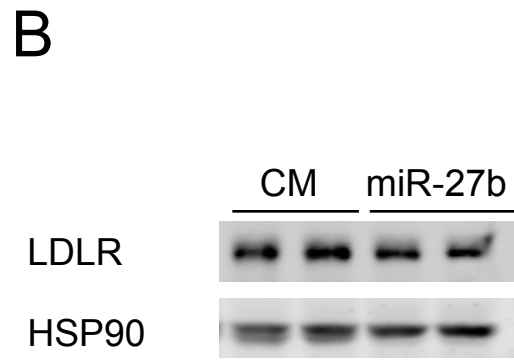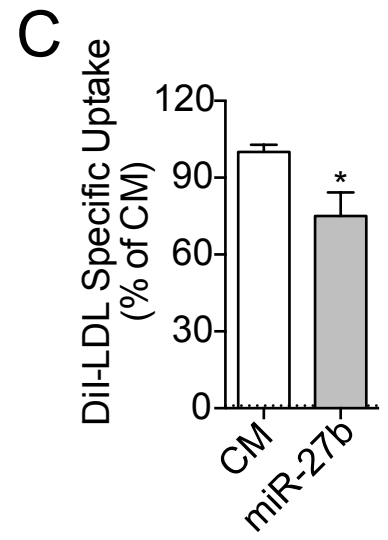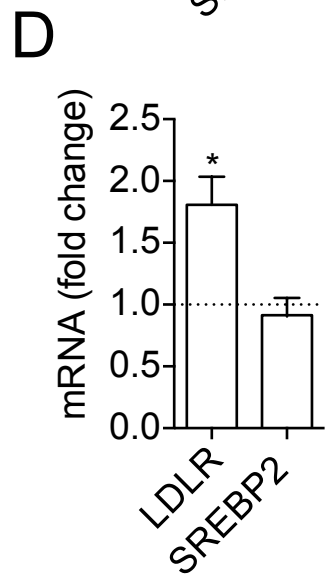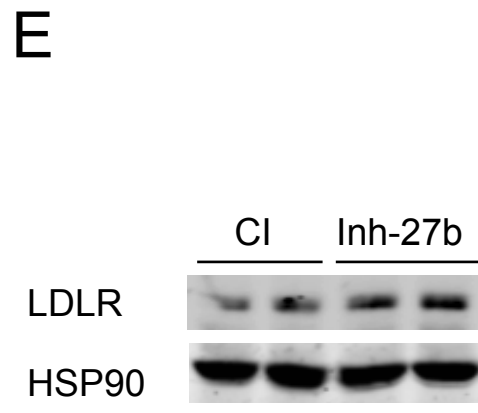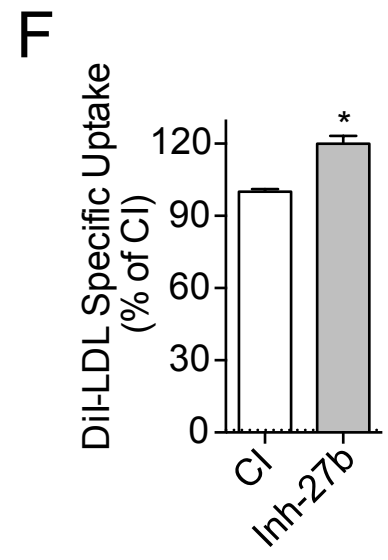

Supplement: NIHMS735530-supplement-2.pdf [file NIHMS735530-supplement-2.pdf]
